# Supplementary material for: High-spin Ni(ii) clusters: triangles and planar tetranuclear complexes
Source: Royal Society of Chemistry journal article supplement (doi:10.1039/c0dt01705a), 2011-01-01
Supplement: c0dt01705a.pdf [file c0dt01705a.pdf]

# High-spin Ni(II) clusters: triangles and planar tetranuclear complexes

Athanassios D. Katsenis,<sup>a</sup> Vadim G. Kessler<sup>b</sup> and Giannis S. Papaefstathiou<sup>\*a</sup>

<sup>a</sup> Laboratory of Inorganic Chemistry, Department of Chemistry, National and Kapodistrian University of Athens, Panepistimiopolis, 157 71 Zografou, Greece. Fax: +30 210 – 727 – 4782; Tel: +30 210 –727 – 4840; E-mail: [gspapaef@chem.uoa.gr](mailto:gspapaef@chem.uoa.gr)

<sup>b</sup> Department of Chemistry, Swedish University of Agricultural Sciences, Box 7015, 750 07 Uppsala, Sweden.

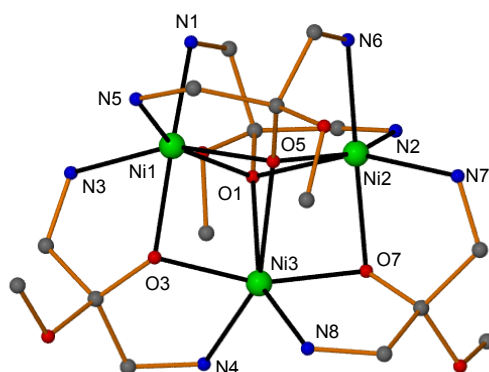

Fig. S1 The molecular structure of complex 4. Most carbon and all hydrogen atoms have been omitted for clarity.

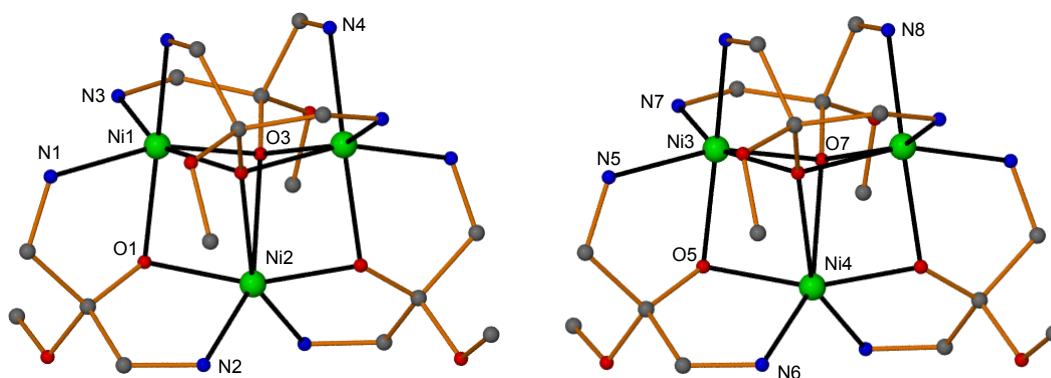

Fig. S2 The structures of the two [Ni<sub>3</sub>] triangles found in the crystal structure of complex 5. Most carbon and all hydrogen atoms have been omitted for clarity.

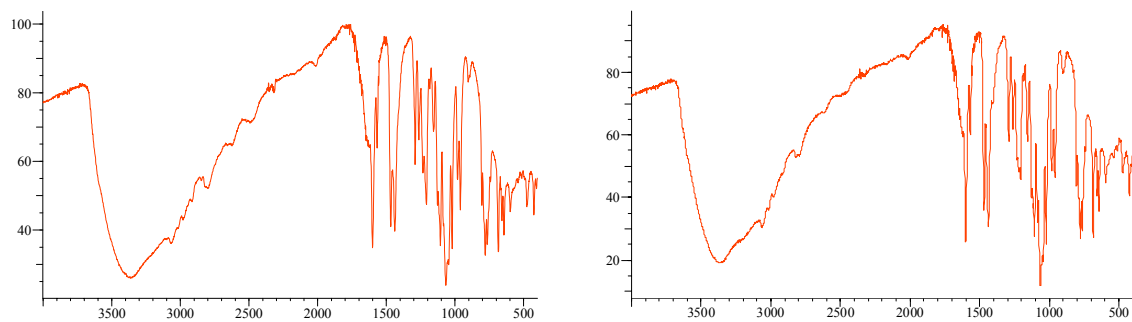

**Fig. S3** The IR spectra (KBr disks) of complex **1** (left) and **2** (right) in the 4000 – 400 cm<sup>-1</sup> region.

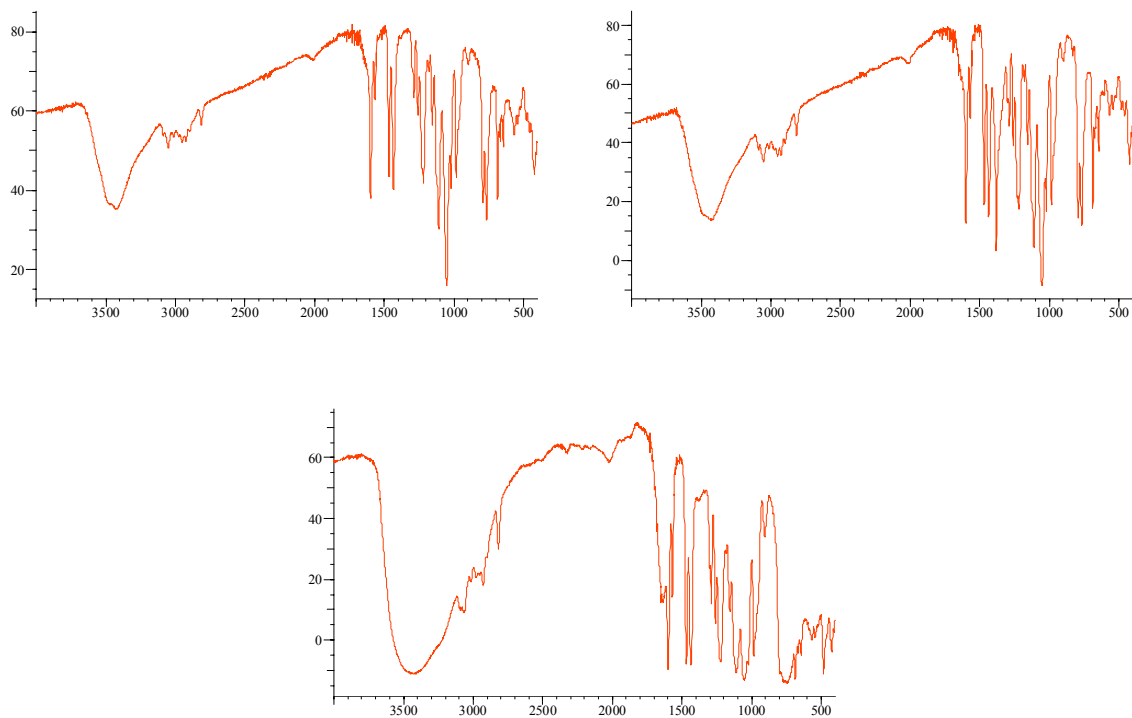

**Fig. S4** The IR spectra (KBr disks) of complex **3** (top left), **4** (top right) and **5** (bottom) in the 4000 – 400 cm<sup>-1</sup> region.

**Table S1** Selected interatomic distances (Å) and angles (°) for complex **1**.<sup>a</sup>

|              |             |               |             |
|--------------|-------------|---------------|-------------|
| Ni1...Ni2    | 3.374       | Ni1...Ni2#1   | 3.101       |
| Ni1...Ni1#1  | 5.663       | Ni2...Ni2#1   | 3.151       |
| Ni1-O3       | 2.019 (2)   | Ni2-O1#1      | 2.028 (2)   |
| Ni1-N2       | 2.070 (3)   | Ni2-N4#1      | 2.042 (3)   |
| Ni1-N3       | 2.089 (3)   | Ni2-N1#1      | 2.092 (3)   |
| Ni1-O5       | 2.134 (3)   | Ni2-O1        | 2.106 (2)   |
| Ni1-O1       | 2.165 (2)   | Ni2-O3#1      | 2.126 (2)   |
| Ni1-C11      | 2.4051 (11) | Ni2-C11       | 2.4275 (10) |
| O3-Ni1-N2    | 156.68 (11) | O1#1-Ni2-N4#1 | 158.76 (11) |
| O3-Ni1-N3    | 78.77 (11)  | O1#1-Ni2-N1#1 | 77.80 (10)  |
| N2-Ni1-N3    | 97.39 (12)  | N4#1-Ni2-N1#1 | 99.79 (12)  |
| O3-Ni1-O5    | 107.43 (10) | O1#1-Ni2-O1   | 80.67 (9)   |
| N2-Ni1-O5    | 94.95 (11)  | N4#1-Ni2-O1   | 106.08 (11) |
| N3-Ni1-O5    | 84.54 (11)  | N1#1-Ni2-O1   | 153.09 (10) |
| O3-Ni1-O1    | 81.27 (9)   | O1#1-Ni2-O3#1 | 82.02 (9)   |
| N2-Ni1-O1    | 77.45 (10)  | N4#1-Ni2-O3#1 | 78.09 (11)  |
| N3-Ni1-O1    | 104.56 (10) | N1#1-Ni2-O3#1 | 103.94 (10) |
| O5-Ni1-O1    | 168.70 (10) | O1-Ni2-O3#1   | 88.75 (9)   |
| O3-Ni1-C11   | 91.55 (7)   | O1#1-Ni2-C11  | 104.54 (7)  |
| N2-Ni1-C11   | 95.09 (9)   | N4#1-Ni2-C11  | 96.31 (9)   |
| N3-Ni1-C11   | 166.66 (9)  | N1#1-Ni2-C11  | 86.55 (8)   |
| O5-Ni1-C11   | 89.72 (8)   | O1-Ni2-C11    | 83.41 (7)   |
| O1-Ni1-C11   | 82.73 (7)   | O3#1-Ni2-C11  | 168.74 (7)  |
| Ni1-C11-Ni2  | 88.55 (4)   | Ni2-O1-Ni1    | 104.37 (10) |
| Ni2#1-O1-Ni2 | 99.33 (9)   | Ni1-O3-Ni2#1  | 96.82 (10)  |
| Ni2#1-O1-Ni1 | 95.36 (9)   |               |             |

<sup>a</sup> Symmetry code: (#1) 2-x, 2-y, 1-z.**Table S2** Selected interatomic distances (Å) and angles (°) for complex **2**.<sup>a</sup>

|              |             |               |             |
|--------------|-------------|---------------|-------------|
| Ni1...Ni2    | 3.416       | Ni1...Ni2#1   | 3.094       |
| Ni1...Ni1#1  | 5.700       | Ni2...Ni2#1   | 3.161       |
| Ni1-O3       | 2.011 (1)   | Ni2-O1#1      | 2.035 (3)   |
| Ni1-N2       | 2.052 (4)   | Ni2-N4#1      | 2.051 (5)   |
| Ni1-N3       | 2.089 (4)   | Ni2-N1#1      | 2.088 (4)   |
| Ni1-O5       | 2.110 (4)   | Ni2-O1        | 2.104 (3)   |
| Ni1-O1       | 2.168 (3)   | Ni2-O3#1      | 2.112 (4)   |
| Ni1-Br1      | 2.5312 (8)  | Ni2-Br1       | 2.5641 (8)  |
| O3-Ni1-N2    | 156.68 (16) | O1#1-Ni2-N4#1 | 158.36 (17) |
| O3-Ni1-N3    | 78.54 (16)  | O1#1-Ni2-N1#1 | 78.21 (15)  |
| N2-Ni1-N3    | 99.28 (17)  | N4#1-Ni2-N1#1 | 101.65 (18) |
| O3-Ni1-O5    | 108.76 (15) | O1#1-Ni2-O1   | 80.40 (14)  |
| N2-Ni1-O5    | 93.93 (16)  | N4#1-Ni2-O1   | 104.36 (16) |
| N3-Ni1-O5    | 83.80 (16)  | N1#1-Ni2-O1   | 152.91 (15) |
| O3-Ni1-O1    | 80.80 (13)  | O1#1-Ni2-O3#1 | 81.63 (13)  |
| N2-Ni1-O1    | 77.29 (14)  | N4#1-Ni2-O3#1 | 77.43 (17)  |
| N3-Ni1-O1    | 104.59 (14) | N1#1-Ni2-O3#1 | 104.25 (15) |
| O5-Ni1-O1    | 168.61 (14) | O1-Ni2-O3#1   | 88.78 (13)  |
| O3-Ni1-Br1   | 90.70 (10)  | O1#1-Ni2-Br1  | 104.81 (10) |
| N2-Ni1-Br1   | 94.88 (12)  | N4#1-Ni2-Br1  | 96.70 (14)  |
| N3-Ni1-Br1   | 164.70 (13) | N1#1-Ni2-Br1  | 85.03 (11)  |
| O5-Ni1-Br1   | 89.51 (11)  | O1-Ni2-Br1    | 84.57 (9)   |
| O1-Ni1-Br1   | 84.10 (9)   | O3#1-Ni2-Br1  | 169.78 (10) |
| Ni1-Br1-Ni2  | 84.19 (2)   | Ni2-O1-Ni1    | 106.19 (14) |
| Ni2#1-O1-Ni2 | 99.60 (14)  | Ni1-O3-Ni2#1  | 97.23 (15)  |
| Ni2#1-O1-Ni1 | 94.76 (13)  |               |             |

<sup>a</sup> Symmetry code: (#1) -x, 1-y, 1-z.**Table S3** Selected interatomic distances (Å) and angles (°) for complex **3**.

|           |          |        |          |
|-----------|----------|--------|----------|
| Ni1...Ni2 | 2.811    | Ni2-N2 | 1.993(5) |
| Ni2...Ni3 | 2.815    | Ni2-N7 | 1.994(4) |
| Ni3...Ni1 | 3.187    | Ni2-O5 | 2.328(3) |
| Ni1-O5    | 2.042(3) | Ni2-O3 | 2.413(3) |
| Ni1-N3    | 2.042(4) | Ni3-O3 | 2.033(3) |

|           |            |           |            |
|-----------|------------|-----------|------------|
| Ni1–O1    | 2.049(3)   | Ni3–N6    | 2.038(4)   |
| Ni1–N1    | 2.061(4)   | Ni3–O7    | 2.054(3)   |
| Ni1–N5    | 2.070(4)   | Ni3–N8    | 2.072(4)   |
| Ni1–O3    | 2.110(3)   | Ni3–N4    | 2.076(4)   |
| Ni2–O7    | 1.938(3)   | Ni3–O5    | 2.133(3)   |
| Ni2–O1    | 1.942(3)   |           |            |
| O5–Ni1–N3 | 154.01(14) | N2–Ni2–O5 | 103.32(14) |
| O5–Ni1–O1 | 93.07(12)  | N7–Ni2–O5 | 153.87(15) |
| N3–Ni1–O1 | 94.61(14)  | O1–Ni2–O3 | 75.84(12)  |
| O5–Ni1–N1 | 101.39(14) | O3–Ni2–O5 | 66.19(10)  |
| N3–Ni1–N1 | 104.47(16) | O3–Ni2–O7 | 86.51(12)  |
| O1–Ni1–N1 | 78.35(13)  | O3–Ni2–N2 | 155.82(15) |
| O5–Ni1–N5 | 78.35(13)  | O3–Ni2–N7 | 96.64(15)  |
| N3–Ni1–N5 | 96.47(16)  | O3–Ni3–N6 | 153.93(15) |
| O1–Ni1–N5 | 168.52(14) | O3–Ni3–O7 | 94.52(13)  |
| N1–Ni1–N5 | 95.90(15)  | N6–Ni3–O7 | 92.90(15)  |
| O5–Ni1–O3 | 77.18(12)  | O3–Ni3–N8 | 103.72(14) |
| N3–Ni1–O3 | 79.56(14)  | N6–Ni3–N8 | 102.24(16) |
| O1–Ni1–O3 | 81.03(12)  | O7–Ni3–N8 | 78.51(14)  |
| N1–Ni1–O3 | 159.23(13) | O3–Ni3–N4 | 77.95(13)  |
| N5–Ni1–O3 | 103.95(14) | N6–Ni3–N4 | 97.76(16)  |
| O7–Ni2–O1 | 160.56(13) | O7–Ni3–N4 | 168.30(14) |
| O7–Ni2–N2 | 113.37(16) | N8–Ni3–N4 | 94.45(15)  |
| O1–Ni2–N2 | 82.17(15)  | O3–Ni3–O5 | 76.83(11)  |
| O7–Ni2–N7 | 81.87(15)  | N6–Ni3–O5 | 79.90(15)  |
| O1–Ni2–N7 | 107.88(15) | O7–Ni3–O5 | 80.05(12)  |
| N2–Ni2–N7 | 99.64(17)  | N8–Ni3–O5 | 158.54(14) |
| O7–Ni2–O5 | 77.70(12)  | N4–Ni3–O5 | 106.52(13) |
| O1–Ni2–O5 | 87.62(11)  |           |            |

**Table S4** Selected interatomic distances (Å) and angles (°) for complex 4.

|           |           |           |           |
|-----------|-----------|-----------|-----------|
| Ni1···Ni2 | 3.204     | Ni2–O7    | 2.062(5)  |
| Ni2···Ni3 | 2.823     | Ni2–N7    | 2.077(7)  |
| Ni3···Ni1 | 2.822     | Ni2–N6    | 2.084(7)  |
| Ni1–N5    | 2.038(7)  | Ni2–O1    | 2.149(5)  |
| Ni1–O1    | 2.042(5)  | Ni3–O7    | 1.946(6)  |
| Ni1–O3    | 2.049(5)  | Ni3–O3    | 1.954(5)  |
| Ni1–N3    | 2.078(6)  | Ni3–N4    | 1.998(7)  |
| Ni1–N1    | 2.083(6)  | Ni3–N8    | 2.014(7)  |
| Ni1–O5    | 2.126(5)  | Ni3–O5    | 2.420(5)  |
| Ni2–O5    | 2.034(5)  | Ni3–O1    | 2.319(5)  |
| Ni2–N2    | 2.047(7)  |           |           |
| N5–Ni1–O1 | 154.3(2)  | O7–Ni2–N6 | 168.2(2)  |
| N5–Ni1–O3 | 94.4(2)   | N7–Ni2–N6 | 94.3(3)   |
| O1–Ni1–O3 | 92.7(2)   | O5–Ni2–O1 | 76.51(19) |
| N5–Ni1–N3 | 104.3(3)  | N2–Ni2–O1 | 80.9(3)   |
| O1–Ni1–N3 | 101.4(2)  | O7–Ni2–O1 | 79.8(2)   |
| O3–Ni1–N3 | 78.4(2)   | N7–Ni2–O1 | 158.2(2)  |
| N5–Ni1–N1 | 97.1(3)   | N6–Ni2–O1 | 106.9(2)  |
| O1–Ni1–N1 | 78.2(2)   | O7–Ni3–O3 | 160.5(2)  |
| O3–Ni1–N1 | 168.1(2)  | O7–Ni3–N4 | 113.1(3)  |
| N3–Ni1–N1 | 95.7(3)   | O3–Ni3–N4 | 82.5(3)   |
| N5–Ni1–O5 | 79.9(2)   | O7–Ni3–N8 | 81.8(3)   |
| O1–Ni1–O5 | 76.9(2)   | O3–Ni3–N8 | 107.8(3)  |
| O3–Ni1–O5 | 81.00(19) | N4–Ni3–N8 | 100.0(3)  |
| N3–Ni1–O5 | 159.2(2)  | O7–Ni3–O1 | 78.1(2)   |
| N1–Ni1–O5 | 104.0(2)  | O3–Ni3–O1 | 87.29(19) |
| O5–Ni2–N2 | 154.4(3)  | N4–Ni3–O1 | 102.8(2)  |
| O5–Ni2–O7 | 94.6(2)   | N8–Ni3–O1 | 154.1(2)  |
| N2–Ni2–O7 | 93.0(3)   | O1–Ni3–O5 | 66.30(16) |
| O5–Ni2–N7 | 103.9(2)  | O3–Ni3–O5 | 75.83(18) |
| N2–Ni2–N7 | 101.5(3)  | O5–Ni3–O7 | 86.43(19) |
| O7–Ni2–N7 | 78.4(2)   | O5–Ni3–N4 | 156.0(2)  |
| O5–Ni2–N6 | 77.9(2)   | O5–Ni3–N8 | 96.4(3)   |
| N2–Ni2–N6 | 97.7(3)   |           |           |

**Table S5** Selected interatomic distances (Å) and angles (°) for complex 5.<sup>a</sup>

|               |            |               |            |
|---------------|------------|---------------|------------|
| Ni1...Ni#1    | 3.176      | Ni3...Ni3#2   | 3.172      |
| Ni1...Ni2     | 2.849      | Ni3...Ni4     | 2.844      |
| Ni1-N3        | 2.048(3)   | Ni3-O5        | 2.064(2)   |
| Ni1-O3#1      | 2.051(2)   | Ni3-N5        | 2.082(3)   |
| Ni1-O1        | 2.067(2)   | Ni3-N8#2      | 2.089(3)   |
| Ni1-N1        | 2.093(3)   | Ni3-O7        | 2.135(2)   |
| Ni1-N4#1      | 2.093(3)   | Ni4-O7        | 2.433(3)   |
| Ni1-O3        | 2.107(2)   | Ni4-O7#2      | 2.433(3)   |
| Ni2-O1#1      | 1.931(3)   | Ni4-O5#2      | 1.942(2)   |
| Ni2-O1        | 1.931(3)   | Ni4-O5        | 1.942(2)   |
| Ni2-N2        | 2.002(4)   | Ni4-N6#2      | 1.997(3)   |
| Ni2-N2#1      | 2.002(4)   | Ni4-N6        | 1.997(3)   |
| Ni2-O3        | 2.436(2)   | O3-Ni1#1      | 2.051(2)   |
| Ni2-O3#1      | 2.436(2)   | O7-Ni3#2      | 2.037(2)   |
| Ni3-N7        | 2.031(3)   | N4-Ni1#1      | 2.093(3)   |
| Ni3-O7#2      | 2.037(2)   | N8-Ni3#2      | 2.089(3)   |
| N3-Ni1-O3#1   | 154.03(11) | N7-Ni3-O7#2   | 154.80(11) |
| N3-Ni1-O1     | 96.71(12)  | N7-Ni3-O5     | 95.16(11)  |
| O3#1-Ni1-O1   | 93.24(10)  | O7#2-Ni3-O5   | 93.39(10)  |
| N3-Ni1-N1     | 101.13(12) | N7-Ni3-N5     | 101.17(12) |
| O3#1-Ni1-N1   | 104.38(11) | O7#2-Ni3-N5   | 103.76(11) |
| O1-Ni1-N1     | 78.08(11)  | O5-Ni3-N5     | 78.40(11)  |
| N3-Ni1-N4#1   | 96.12(13)  | N7-Ni3-N8#2   | 96.81(13)  |
| O3#1-Ni1-N4#1 | 77.52(11)  | O7#2-Ni3-N8#2 | 78.03(11)  |
| O1-Ni1-N4#1   | 165.93(12) | O5-Ni3-N8#2   | 166.79(11) |
| N1-Ni1-N4#1   | 93.79(12)  | N5-Ni3-N8#2   | 93.76(12)  |
| N3-Ni1-O3     | 79.82(11)  | N7-Ni3-O7     | 79.34(11)  |
| O3#1-Ni1-O3   | 77.84(10)  | O7#2-Ni3-O7   | 78.36(10)  |
| O1-Ni1-O3     | 82.26(9)   | O5-Ni3-O7     | 82.39(9)   |
| N1-Ni1-O3     | 160.30(11) | N5-Ni3-O7     | 160.76(11) |
| N4#1-Ni1-O3   | 105.73(11) | N8#2-Ni3-O7   | 105.32(11) |
| O1#1-Ni2-O1   | 159.49(15) | O5#2-Ni4-O5   | 159.54(15) |
| O1#1-Ni2-N2   | 109.81(13) | O5#2-Ni4-N6#2 | 82.56(12)  |
| O1-Ni2-N2     | 82.86(12)  | O5-Ni4-N6#2   | 109.89(12) |
| O1#1-Ni2-N2#1 | 82.86(12)  | O5#2-Ni4-N6   | 109.89(12) |
| O1-Ni2-N2#1   | 109.81(13) | O5-Ni4-N6     | 82.56(12)  |
| N2-Ni2-N2#1   | 105.90(19) | N6#2-Ni4-N6   | 107.18(19) |
| O3-Ni2-O1     | 76.97(9)   | O7-Ni4-O5     | 77.55(9)   |
| O3-Ni2-O1#1   | 85.71(10)  | O7-Ni4-O5#2   | 85.25(9)   |
| O3-Ni2-O3#1   | 64.86(8)   | O7-Ni4-O7#2   | 65.62(8)   |
| O3-Ni2-N2     | 153.55(11) | O7-Ni4-N6     | 153.64(11) |
| O3-Ni2-N2#1   | 97.00(11)  | O7-Ni4-N6#2   | 95.85(11)  |
| O3#1-Ni2-O1   | 85.71(10)  | O7#2-Ni4-O5   | 85.25(9)   |
| O3#1-Ni2-O1#1 | 76.97(9)   | O7#2-Ni4-O5#2 | 77.55(9)   |
| O3#1-Ni2-N2   | 97.00(11)  | O7#2-Ni4-N6   | 95.85(11)  |
| O3#1-Ni2-N2#1 | 153.55(11) | O7#2-Ni4-N6#2 | 153.64(11) |

<sup>a</sup> Symmetry codes: (#1) 1-x,y,1/2-z, (#2) 2-x,y,1/2-z.**Table S6** The refcodes of the 24 planar tetranuclear Ni<sup>II</sup> complexes comprising the [Ni<sub>4</sub>X<sub>6</sub>] core (X = donor atom).

|        |        |        |          |
|--------|--------|--------|----------|
| BIFKEH | HOWQUF | LOMSUC | UKISOW   |
| BIFKIL | IGOJUF | RICQAW | UKISUC   |
| CUFTUS | JAZROS | SAXNUB | MOTMOY   |
| DEGSAK | KAMNES | SEKPEE | IGIGAH   |
| FIQKUM | KISBAQ | TIVSIB | RUMYII   |
| FIQLIB | KISBEU | TIVSOH | RUMYII01 |
